# Supplementary material for: Plant–soil feedback effects on conspecific and heterospecific successors of annual and perennial Central European grassland plants are correlated
Source: Springer Nature journal article supplement (doi:10.1038/s41477-023-01433-w), 2023-06-08
Supplement: 41477_2023_1433_MOESM1_ESM.pdf [file 41477_2023_1433_MOESM1_ESM.pdf]

---

# **Plant–soil feedback effects on conspecific and heterospecific successors of annual and perennial Central European grassland plants are correlated**

---

In the format provided by the authors and unedited

---

## Supplementary information

### Table of Contents:

|                                                                                                      |    |
|------------------------------------------------------------------------------------------------------|----|
| <b>Supplementary Table 1:</b> List of experimental plant species                                     | 2  |
| <b>Supplementary Table 2:</b> Effects of conditioning and responding plant groups on PSF responses   | 2  |
| <b>Supplementary Table 3:</b> Effects of soil conditioning types on PSF responses                    | 3  |
| <b>Supplementary Table 4:</b> Effects of conditioning and responding plant species on PSF responses  | 4  |
| <b>Supplementary Table 5:</b> Plant group effects on structural root traits                          | 4  |
| <b>Supplementary Table 6:</b> Root trait relations with PSF responses                                | 4  |
| <b>Supplementary Table 7:</b> Fungal community composition effects on PSF responses                  | 5  |
| <b>Supplementary Table 8:</b> Legume-conditioned soil dependency of fungal-community effects on PSF  | 5  |
| <b>Supplementary Table 9:</b> Plant group effects on pathogen abundances                             | 6  |
| <b>Supplementary Table 10:</b> Plant group effects on arbuscular mycorrhizal fungal abundances       | 7  |
| <b>Supplementary Table 11:</b> Plant species effects on pathogen and AMF abundances                  | 7  |
| <b>Supplementary Table 12:</b> Pathogen and AMF effects on PSF responses                             | 8  |
| <b>Supplementary Table 13:</b> Legume-conditioned soil dependency of fungal abundance effects on PSF | 8  |
| <b>Supplementary Table 14:</b> Taxonomic identity of the most prevalent putative pathogenic ASVs     | 9  |
| <b>Supplementary Table 15:</b> List of chemical properties detected in irrigation water              | 10 |

**Supplementary Table 1:** List of 18 annual and perennial native plant species used in the presented study. Asterisks (\*) indicate species that occur at the soil-collection site or in the direct surroundings of the soil-collection site (Botanical Garden, University of Konstanz; personal observation).

| Annual species                        | Perennial species                     | Family          |
|---------------------------------------|---------------------------------------|-----------------|
| <i>Sonchus oleraceus</i> L.*          | <i>Cichorium intybus</i> L.*          | Asteraceae      |
| <i>Centaurea cyanus</i> L.            | <i>Centaurea jacea</i> L.*            | Asteraceae      |
| <i>Anchusa arvensis</i> (L.) M.Bieb.  | <i>Anchusa officinalis</i> L.         | Boraginaceae    |
| <i>Sinapis arvensis</i> L.*           | <i>Diplotaxis tenuifolia</i> (L.) DC. | Brassicaceae    |
| <i>Agrostemma githago</i> L.          | <i>Cerastium fontanum</i> Baumg.*     | Caryophyllaceae |
| <i>Vicia sativa</i> L.*               | <i>Vicia cracca</i> L.*               | Fabaceae        |
| <i>Trifolium campestre</i> Schreb.    | <i>Trifolium medium</i> L.*           | Fabaceae        |
| <i>Lamium purpureum</i> L.*           | <i>Prunella vulgaris</i> L.*          | Lamiaceae       |
| <i>Clinopodium acinos</i> (L.) Kuntze | <i>Salvia pratensis</i> L.*           | Lamiaceae       |

**Supplementary Table 2:** Results of the linear mixed model for main and interactive effects of conditioning and responding plant group (annual vs. perennial) on plant-soil-feedback responses (PSF =  $\ln(\text{total biomass}_{\text{conditioned}}/\text{total biomass}_{\text{control}})$ ). Significant effects ( $p < 0.05$ ), as indicated by Log-likelihood ratio test, are indicated in bold.

| Fixed effects                       | $\chi^2$     | df       | P                |
|-------------------------------------|--------------|----------|------------------|
| Responding group                    | <b>4.34</b>  | <b>1</b> | <b>0.037</b>     |
| Conditioning group                  | 0.33         | 1        | 0.566            |
| Responding group*Conditioning group | 0.32         | 1        | 0.575            |
| log(Biomass phase 1)                | 0.64         | 1        | 0.424            |
| Initial size difference             | <b>42.48</b> | <b>1</b> | <b>&lt;0.001</b> |
| Random effects                      | s.d.         |          |                  |
| Block                               | 0.073        |          |                  |
| Soil mix                            | 0.002        |          |                  |
| Conditioning species                | 0.122        |          |                  |
| Conditioning family                 | 0.049        |          |                  |
| Responding family                   | 0.189        |          |                  |
| Responding species                  |              |          |                  |
| <i>Agrostemma githago</i>           | 0.163        |          |                  |
| <i>Anchusa arvensis</i>             | 0.110        |          |                  |
| <i>Anchusa officinalis</i>          | 0.161        |          |                  |
| <i>Centaurea cyanus</i>             | 0.145        |          |                  |
| <i>Centaurea jacea</i>              | 0.121        |          |                  |
| <i>Cerastium fontanum</i>           | 0.143        |          |                  |
| <i>Cichorium intybus</i>            | 0.101        |          |                  |
| <i>Clinopodium acinos</i>           | 0.131        |          |                  |
| <i>Diplotaxis tenuifolia</i>        | 0.131        |          |                  |
| <i>Lamium purpureum</i>             | 0.169        |          |                  |
| <i>Prunella vulgaris</i>            | 0.175        |          |                  |
| <i>Salvia pratensis</i>             | 0.101        |          |                  |
| <i>Sinapis arvensis</i>             | 0.109        |          |                  |
| <i>Sonchus oleraceus</i>            | 0.205        |          |                  |
| <i>Trifolium campestre</i>          | 0.183        |          |                  |
| <i>Trifolium medium</i>             | 0.215        |          |                  |
| <i>Vicia cracca</i>                 | 0.223        |          |                  |
| <i>Vicia sativa</i>                 | 0.113        |          |                  |

**Supplementary Table 3:** Results of the linear mixed model for main and interactive effects of conditioning treatments (1: conspecific vs. heterospecific conditioning; 2: heterospecific conditioning by annuals vs. perennials) and responding plant group (annual vs. perennial) on plant-soil-feedback responses ( $PSF = \ln(\text{total biomass}_{\text{conditioned}}/\text{total biomass}_{\text{control}})$ ). Significant effects ( $p < 0.05$ ), as indicated by Log-likelihood ratio test, are indicated in bold.

| <b>Fixed effects</b>                                                     | <b><math>\chi^2</math></b> | <b>df</b> | <b>P</b>         |
|--------------------------------------------------------------------------|----------------------------|-----------|------------------|
| Responding group                                                         | <b>4.29</b>                | <b>1</b>  | <b>0.038</b>     |
| Conditioning <sub>conspecific/heterospecific</sub>                       | 0.17                       | 1         | 0.681            |
| Heterospecific conditioning <sub>annual/perennial</sub>                  | 0.28                       | 1         | 0.594            |
| Responding group*Conditioning <sub>conspecific/heterospecific</sub>      | 0.43                       | 1         | 0.511            |
| Responding group*Heterospecific conditioning <sub>annual/perennial</sub> | 0.22                       | 1         | 0.641            |
| log(Biomass phase 1)                                                     | 0.65                       | 1         | 0.422            |
| Initial size difference                                                  | <b>42.34</b>               | <b>1</b>  | <b>&lt;0.001</b> |
| <b>Random effects</b>                                                    | <b>s.d.</b>                |           |                  |
| Block                                                                    | 0.073                      |           |                  |
| Soil mix                                                                 | 0.002                      |           |                  |
| Conditioning species                                                     | 0.122                      |           |                  |
| Conditioning family                                                      | 0.049                      |           |                  |
| Responding family                                                        | 0.189                      |           |                  |
| Responding species                                                       |                            |           |                  |
| <i>Agrostemma githago</i>                                                | 0.163                      |           |                  |
| <i>Anchusa arvensis</i>                                                  | 0.110                      |           |                  |
| <i>Anchusa officinalis</i>                                               | 0.161                      |           |                  |
| <i>Centaurea cyanus</i>                                                  | 0.145                      |           |                  |
| <i>Centaurea jacea</i>                                                   | 0.121                      |           |                  |
| <i>Cerastium fontanum</i>                                                | 0.143                      |           |                  |
| <i>Cichorium intybus</i>                                                 | 0.101                      |           |                  |
| <i>Clinopodium acinos</i>                                                | 0.131                      |           |                  |
| <i>Diplotaxis tenuifolia</i>                                             | 0.131                      |           |                  |
| <i>Lamium purpureum</i>                                                  | 0.169                      |           |                  |
| <i>Prunella vulgaris</i>                                                 | 0.175                      |           |                  |
| <i>Salvia pratensis</i>                                                  | 0.101                      |           |                  |
| <i>Sinapis arvensis</i>                                                  | 0.110                      |           |                  |
| <i>Sonchus oleraceus</i>                                                 | 0.205                      |           |                  |
| <i>Trifolium campestre</i>                                               | 0.183                      |           |                  |
| <i>Trifolium medium</i>                                                  | 0.215                      |           |                  |
| <i>Vicia cracca</i>                                                      | 0.223                      |           |                  |
| <i>Vicia sativa</i>                                                      | 0.113                      |           |                  |

**Supplementary Table 4:** Results of the linear mixed model for main and interactive effects of conditioning and responding plant species on plant-soil-feedback responses (PSF =  $\ln(\text{total biomass}_{\text{conditioned}}/\text{total biomass}_{\text{control}})$ ). Significant effects ( $p < 0.05$ ), as indicated by Log-likelihood ratio test, are indicated in bold.

| <b>Fixed effects</b>                    | <b>X<sup>2</sup></b> | <b>df</b> | <b>p</b>         |
|-----------------------------------------|----------------------|-----------|------------------|
| Responding species                      | <b>369.97</b>        | <b>17</b> | <b>&lt;0.001</b> |
| Conditioning species                    | <b>93.41</b>         | <b>17</b> | <b>&lt;0.001</b> |
| Responding species*Conditioning species | 220.28               | 289       | 0.999            |
| log(Biomass phase 1)                    | 0.1                  | 1         | 0.760            |
| Initial size difference                 | <b>9.69</b>          | <b>1</b>  | <b>0.002</b>     |
| <b>Random effects</b>                   | <b>s.d.</b>          |           |                  |
| Block                                   | 0.085                |           |                  |
| Soil mix                                | <0.000               |           |                  |

**Supplementary Table 5:** Results of the linear mixed model for the main effect of plant group (annual vs. perennial) on structural root traits ‘specific root length’, ‘relative root weight’ and ‘average root diameter’. Significant effects ( $p < 0.05$ ), as indicated by Log-likelihood ratio test, are indicated in bold.

| <b>Model part</b> | <b>Factor</b> | <i>log(Specific root length)</i> |           |                  | <i>sqrt(Relative root weight)</i> |           |              | <i>Average root diameter</i> |           |              |
|-------------------|---------------|----------------------------------|-----------|------------------|-----------------------------------|-----------|--------------|------------------------------|-----------|--------------|
|                   |               | <b>X<sup>2</sup></b>             | <b>df</b> | <b>P</b>         | <b>X<sup>2</sup></b>              | <b>df</b> | <b>P</b>     | <b>X<sup>2</sup></b>         | <b>df</b> | <b>P</b>     |
| <b>Fixed</b>      | Group         | <b>12.21</b>                     | <b>1</b>  | <b>&lt;0.001</b> | <b>8.26</b>                       | <b>1</b>  | <b>0.004</b> | <b>4.05</b>                  | <b>1</b>  | <b>0.044</b> |
| <b>Random</b>     |               | <b>s.d.</b>                      |           |                  | <b>s.d.</b>                       |           |              | <b>s.d.</b>                  |           |              |
|                   | Species       | 0.50                             |           |                  | 0.12                              |           |              | 0.71                         |           |              |

**Supplementary Table 6:** Results of general linear models assessing the effects of two structural root traits, specific root length (upper part) and relative root weight (lower part), the life history of the responding plant group (annual vs. perennial) and the two-way interactions on plant-soil feedback responses of 18 plant species (see Methods). Significant effects ( $p < 0.05$ ), as indicated by F-tests, are indicated in bold and marginally significant results ( $0.05 < p < 0.10$ ) are indicated in italics.

|                            | <i>Average PSF response</i> |          |              |
|----------------------------|-----------------------------|----------|--------------|
|                            | F                           | df       | P            |
| log(SRL)                   | 3.55                        | 1        | 0.081        |
| Responding plant group (R) | 0.01                        | 1        | 0.936        |
| log(SRL)*R                 | 0.02                        | 1        | 0.885        |
|                            | F                           | df       | P            |
| sqrt(RRW)                  | <b>6.28</b>                 | <b>1</b> | <b>0.025</b> |
| Responding plant group (R) | 0.01                        | 1        | 0.917        |
| sqrt(RRW)*R                | 0.03                        | 1        | 0.876        |

**Supplementary Table 7:** Results of the linear mixed model for the main effects of NMDS-axes representing community composition of 1) complete fungal communities, 2) putative pathogen communities and 3) arbuscular mycorrhizal fungal communities on average plant-soil-feedback responses in soils conditioned by 18 different annual and perennial plant species. Significant effects ( $p < 0.05$ ), as indicated by Log-likelihood ratio test, are indicated in bold and marginally significant results ( $0.05 < p < 0.10$ ) are indicated in italics.

| Model part    | Factor | <i>Full community</i> |          |              | <i>Putative Pathogens</i> |    |       | <i>AMF</i>  |    |       |
|---------------|--------|-----------------------|----------|--------------|---------------------------|----|-------|-------------|----|-------|
|               |        | $\chi^2$              | df       | P            | $\chi^2$                  | df | P     | $\chi^2$    | df | P     |
| <b>Fixed</b>  | NMDS1  | 1.74                  | 1        | 0.187        | 2.10                      | 1  | 0.147 | <0.001      | 1  | 0.987 |
|               | NMDS2  | <b>8.28</b>           | <b>1</b> | <b>0.004</b> | 3.62                      | 1  | 0.057 | 0.083       | 1  | 0.773 |
|               | NMDS3  | 1.16                  | 1        | 0.281        | 1.07                      | 1  | 0.301 | 0.326       | 1  | 0.568 |
| <b>Random</b> |        | <b>s.d.</b>           |          |              | <b>s.d.</b>               |    |       | <b>s.d.</b> |    |       |
|               | Block  | 0.09                  |          |              | 0.08                      |    |       | 0.08        |    |       |

**Supplementary Table 8:** Results of the linear mixed model for the main effects of NMDS-axes representing community composition on average plant-soil-feedback responses in soils conditioned by 18 different annual and perennial plant species, considering the effect of whether soils were conditioned by legumes (yes/no). Analyses were run separately for 1) complete fungal communities, 2) putative pathogen communities or 3) arbuscular mycorrhizal fungal (AMF) communities. Significant effects ( $p < 0.05$ ), as indicated by Log-likelihood ratio test, are indicated in bold.

| Model part    | Factor            | <i>Full community</i> |          |              | <i>Putative pathogens</i> |          |                  | <i>AMF</i>   |          |                  |
|---------------|-------------------|-----------------------|----------|--------------|---------------------------|----------|------------------|--------------|----------|------------------|
|               |                   | $\chi^2$              | df       | P            | $\chi^2$                  | df       | P                | $\chi^2$     | df       | P                |
| <b>Fixed</b>  | NMDS1             | 1.09                  | 1        | 0.297        | 0.40                      | 1        | 0.528            | 1.13         | 1        | 0.288            |
|               | NMDS2             | 1.45                  | 1        | 0.228        | 0.19                      | 1        | 0.660            | 0.13         | 1        | 0.714            |
|               | NMDS3             | 0.63                  | 1        | 0.428        | 1.93                      | 1        | 0.165            | 0.36         | 1        | 0.550            |
|               | <b>Legume (L)</b> | <b>8.36</b>           | <b>1</b> | <b>0.004</b> | <b>14.29</b>              | <b>1</b> | <b>&lt;0.001</b> | <b>17.76</b> | <b>1</b> | <b>&lt;0.001</b> |
|               | NMDS1*L           | 0.33                  | 1        | 0.564        | 0.22                      | 1        | 0.645            | 0.01         | 1        | 0.910            |
|               | NMDS2*L           | 0.57                  | 1        | 0.450        | 0.06                      | 1        | 0.810            | 0.51         | 1        | 0.475            |
|               | NMDS3*L           | 0.72                  | 1        | 0.395        | 1.23                      | 1        | 0.267            | 0.02         | 1        | 0.881            |
| <b>Random</b> |                   | <b>s.d.</b>           |          |              | <b>s.d.</b>               |          |                  | <b>s.d.</b>  |          |                  |
|               | Block             | 0.08                  |          |              | 0.08                      |          |                  | 0.08         |          |                  |

**Supplementary Table 9:** Plant group (annual vs. perennial) effects on logit-transformed relative abundances of all putative pathogens and on logit-transformed relative abundances of putative generalist and specialist putative pathogens (see methods). Significant effects ( $p < 0.05$ ) are indicated in bold and marginally significant results ( $0.05 < p < 0.10$ ), as indicated by Log-likelihood ratio test, are indicated in italics.

| Model part    | Factor                       | <i>All pathogens</i> |           |          | <i>Generalist pathogens</i> |           |          | <i>Specialist pathogens</i> |           |                  |
|---------------|------------------------------|----------------------|-----------|----------|-----------------------------|-----------|----------|-----------------------------|-----------|------------------|
|               |                              | <b>X<sup>2</sup></b> | <b>df</b> | <b>P</b> | <b>X<sup>2</sup></b>        | <b>df</b> | <b>P</b> | <b>X<sup>2</sup></b>        | <b>df</b> | <b>P</b>         |
| <b>Fixed</b>  | Group                        | 0.97                 | 1         | 0.326    | 0.73                        | 1         | 0.392    | 3.65                        | 1         | <i>0.056</i>     |
|               | Read number                  | 0.07                 | 1         | 0.790    | 0.03                        | 1         | 0.869    | <b>23.92</b>                | <b>1</b>  | <b>&lt;0.001</b> |
| <b>Random</b> |                              | <b>s.d.</b>          |           |          | <b>s.d.</b>                 |           |          | <b>s.d.</b>                 |           |                  |
|               | Plant family                 | 1.97                 |           |          | 1.91                        |           |          | 1.50                        |           |                  |
|               | Block                        | 0.15                 |           |          | 0.15                        |           |          | 0.10                        |           |                  |
|               | <b>Plant species</b>         |                      |           |          |                             |           |          |                             |           |                  |
|               | <i>Agrostemma githago</i>    | 0.59                 |           |          | 0.31                        |           |          | 0.11                        |           |                  |
|               | <i>Anchusa arvensis</i>      | 0.38                 |           |          | 0.19                        |           |          | 0.03                        |           |                  |
|               | <i>Anchusa officinalis</i>   | 0.35                 |           |          | 0.17                        |           |          | 0.10                        |           |                  |
|               | <i>Centaurea cyanus</i>      | 0.29                 |           |          | 0.15                        |           |          | 0.10                        |           |                  |
|               | <i>Centaurea jacea</i>       | 0.28                 |           |          | 0.20                        |           |          | 0.16                        |           |                  |
|               | <i>Cerastium fontanum</i>    | 1.12                 |           |          | 0.57                        |           |          | 0.05                        |           |                  |
|               | <i>Cichorium intybus</i>     | 0.51                 |           |          | 0.26                        |           |          | 0.10                        |           |                  |
|               | <i>Clinopodium acinos</i>    | 0.15                 |           |          | 0.06                        |           |          | 0.08                        |           |                  |
|               | <i>Diplotaxis tenuifolia</i> | 0.68                 |           |          | 0.34                        |           |          | 0.04                        |           |                  |
|               | <i>Lamium purpureum</i>      | 0.29                 |           |          | 0.15                        |           |          | 0.03                        |           |                  |
|               | <i>Prunella vulgaris</i>     | 0.04                 |           |          | 0.03                        |           |          | 0.08                        |           |                  |
|               | <i>Salvia pratensis</i>      | 1.07                 |           |          | 0.53                        |           |          | 0.14                        |           |                  |
|               | <i>Sinapis arvensis</i>      | 0.24                 |           |          | 0.16                        |           |          | 0.08                        |           |                  |
|               | <i>Sonchus oleraceus</i>     | 0.24                 |           |          | 0.12                        |           |          | 0.09                        |           |                  |
|               | <i>Trifolium campestre</i>   | 0.14                 |           |          | 0.08                        |           |          | 0.08                        |           |                  |
|               | <i>Trifolium medium</i>      | 0.87                 |           |          | 0.47                        |           |          | 0.00                        |           |                  |
|               | <i>Vicia cracca</i>          | 0.66                 |           |          | 0.34                        |           |          | 0.08                        |           |                  |
|               | <i>Vicia sativa</i>          | 0.24                 |           |          | 0.11                        |           |          | 0.08                        |           |                  |

**Supplementary Table 10:** Plant group (annual vs. perennial) effects on logit-transformed relative abundances of all arbuscular mycorrhizal fungi (AMF) and on logit-transformed relative abundances of generalist and specialist AMF (see methods). Significant effects ( $p < 0.05$ ), as indicated by Log-likelihood ratio test, are indicated in bold.

| Model part | Factor                       | All AMF        |    |       | Generalist AMF |    |       | Specialist AMF |          |              |
|------------|------------------------------|----------------|----|-------|----------------|----|-------|----------------|----------|--------------|
|            |                              | X <sup>2</sup> | df | P     | X <sup>2</sup> | df | P     | X <sup>2</sup> | df       | P            |
| Fixed      | Group                        | 1.03           | 1  | 0.310 | 0.62           | 1  | 0.429 | 0.17           | 1        | 0.689        |
|            | Read number                  | 1.27           | 1  | 0.259 | 0.57           | 1  | 0.451 | <b>6.47</b>    | <b>1</b> | <b>0.011</b> |
| Random     |                              | s.d.           |    |       | s.d.           |    |       | s.d.           |          |              |
|            | Plant family                 | 1.23           |    |       | 1.09           |    |       | 1.10           |          |              |
|            | Block                        | 0.88           |    |       | 0.65           |    |       | 0.89           |          |              |
|            | Plant species                |                |    |       |                |    |       |                |          |              |
|            | <i>Agrostemma githago</i>    | <0.000         |    |       | <0.000         |    |       | <0.000         |          |              |
|            | <i>Anchusa arvensis</i>      | <0.000         |    |       | <0.000         |    |       | <0.000         |          |              |
|            | <i>Anchusa officinalis</i>   | <0.000         |    |       | <0.000         |    |       | <0.000         |          |              |
|            | <i>Centaurea cyanus</i>      | <0.000         |    |       | <0.000         |    |       | <0.000         |          |              |
|            | <i>Centaurea jacea</i>       | <0.000         |    |       | <0.000         |    |       | <0.000         |          |              |
|            | <i>Cerastium fontanum</i>    | <0.000         |    |       | <0.000         |    |       | <0.000         |          |              |
|            | <i>Cichorium intybus</i>     | <0.000         |    |       | <0.000         |    |       | <0.000         |          |              |
|            | <i>Clinopodium acinos</i>    | <0.000         |    |       | <0.000         |    |       | <0.000         |          |              |
|            | <i>Diplotaxis tenuifolia</i> | <0.000         |    |       | <0.000         |    |       | <0.000         |          |              |
|            | <i>Lamium purpureum</i>      | <0.000         |    |       | <0.000         |    |       | <0.000         |          |              |
|            | <i>Prunella vulgaris</i>     | <0.000         |    |       | <0.000         |    |       | <0.000         |          |              |
|            | <i>Salvia pratensis</i>      | <0.000         |    |       | <0.000         |    |       | <0.000         |          |              |
|            | <i>Sinapis arvensis</i>      | <0.000         |    |       | <0.000         |    |       | <0.000         |          |              |
|            | <i>Sonchus oleraceus</i>     | <0.000         |    |       | <0.000         |    |       | <0.000         |          |              |
|            | <i>Trifolium campestre</i>   | <0.000         |    |       | <0.000         |    |       | <0.000         |          |              |
|            | <i>Trifolium medium</i>      | <0.000         |    |       | <0.000         |    |       | <0.000         |          |              |
|            | <i>Vicia cracca</i>          | <0.000         |    |       | <0.000         |    |       | <0.000         |          |              |
|            | <i>Vicia sativa</i>          | <0.000         |    |       | 0.001          |    |       | <0.000         |          |              |

**Supplementary Table 11:** Plant-species-identity effects on logit-transformed total relative abundances of putative pathogens and AMF, and logit-transformed relative abundances of generalist and specialist putative pathogens and AMF (see methods). Significant effects ( $p < 0.05$ ), as indicated by Log-likelihood ratio test, are indicated in bold.

| Model part | Factor        | All pathogens  |           |                  | Generalist pathogens |           |                  | Specialist pathogens |           |                  |
|------------|---------------|----------------|-----------|------------------|----------------------|-----------|------------------|----------------------|-----------|------------------|
|            |               | X <sup>2</sup> | df        | P                | X <sup>2</sup>       | df        | P                | X <sup>2</sup>       | df        | P                |
| Fixed      | Plant species | <b>314.47</b>  | <b>17</b> | <b>&lt;0.001</b> | <b>287.76</b>        | <b>17</b> | <b>&lt;0.001</b> | <b>67.35</b>         | <b>17</b> | <b>&lt;0.001</b> |
|            | Read number   | 0.12           | 1         | 0.726            | 0.05                 | 1         | 0.824            | 0.19                 | 1         | 0.662            |
| Random     |               | s.d.           |           |                  | s.d.                 |           |                  | s.d.                 |           |                  |
|            | Block         | 0.00           |           |                  | 0.00                 |           |                  | 0.00                 |           |                  |
| Model part | Factor        | All AMF        |           |                  | Generalist AMF       |           |                  | Specialist AMF       |           |                  |
|            |               | X <sup>2</sup> | df        | P                | X <sup>2</sup>       | df        | P                | X <sup>2</sup>       | df        | P                |
| Fixed      | Plant species | <b>61.23</b>   | <b>17</b> | <b>&lt;0.001</b> | <b>76.42</b>         | <b>17</b> | <b>&lt;0.001</b> | <b>46.86</b>         | <b>17</b> | <b>&lt;0.001</b> |
|            | Read number   | 1.03           | 1         | 0.311            | 0.38                 | 1         | 0.540            | 1.86                 | 1         | 0.173            |
| Random     |               | s.d.           |           |                  | s.d.                 |           |                  | s.d.                 |           |                  |
|            | Block         | 0.00           |           |                  | 0.00                 |           |                  | 0.28                 |           |                  |



**Supplementary Table 12:** Effects of (logit-transformed) total, generalist and specialist pathogen and arbuscular mycorrhizal abundances on average plant-soil-feedback responses. Significant effects ( $p < 0.05$ ), as indicated by Log-likelihood ratio test, are indicated in bold.

| <b>Model</b>                | Fixed effect: relative abundance |           |              | Random effect: block |
|-----------------------------|----------------------------------|-----------|--------------|----------------------|
|                             | <b>X<sup>2</sup></b>             | <b>df</b> | <b>P</b>     | <b>s.d.</b>          |
| <i>All pathogens</i>        | <b>4.83</b>                      | <b>1</b>  | <b>0.028</b> | 0.08                 |
| <i>Generalist pathogens</i> | <b>4.94</b>                      | <b>1</b>  | <b>0.026</b> | 0.08                 |
| <i>Specialist pathogens</i> | 0.48                             | 1         | 0.490        | 0.07                 |
| <i>All AMF</i>              | 0.48                             | 1         | 0.676        | 0.08                 |
| <i>Generalist AMF</i>       | 0.24                             | 1         | 0.624        | 0.08                 |
| <i>Specialist AMF</i>       | 0.01                             | 1         | 0.903        | 0.07                 |

**Supplementary Table 13:** Effects of (logit-transformed) total and generalist pathogen abundances on average plant-soil-feedback responses, considering the effect of whether soils were conditioned by legumes (yes/no). Significant effects ( $p < 0.05$ ), as indicated by Log-likelihood ratio test, are indicated in bold.

| <b>Model part</b> | <b>Factor</b>           | <i>Pathogens</i>     |           |                  | <i>Generalist pathogens</i> |           |                  |
|-------------------|-------------------------|----------------------|-----------|------------------|-----------------------------|-----------|------------------|
|                   |                         | <b>X<sup>2</sup></b> | <b>df</b> | <b>P</b>         | <b>X<sup>2</sup></b>        | <b>df</b> | <b>P</b>         |
| <b>Fixed</b>      | Relative abundance (R)  | 1.09                 | 1         | 0.296            | 1.13                        | 1         | 0.288            |
|                   | Legume conditioning (L) | <b>15.51</b>         | <b>1</b>  | <b>&lt;0.001</b> | <b>15.42</b>                | <b>1</b>  | <b>&lt;0.001</b> |
|                   | R*L                     | 1.08                 | 1         | 0.299            | 1.00                        | 1         | 0.318            |
| <b>Random</b>     |                         | <b>s.d.</b>          |           |                  | <b>s.d.</b>                 |           |                  |
|                   | Block                   | 0.08                 |           |                  | 0.08                        |           |                  |

**Supplementary Table 14:** Taxonomic identity of the 20 most prevalent putative pathogenic ASVs in plant-conditioned soils, based on maximum relative abundance in single samples. Columns 'Plant species' and 'Samples' indicate the number of conditioning species and conditioned soil samples in which ASVs were detected (total number of samples = 87), while average and maximum abundance indicate the average ASV abundance across all samples, and maximum ASV abundance in a single sample, respectively. Asterisks (\*) indicate ASVs that are considered as host-generalists in our study, based on their occurrence in at least 2/3 (i.e. 12) of the plant species. Species ordering is based on average abundance across samples.

| ID     | Family               | Genus                   | Species          | Plant species | Samples | Average abundance (%) | Maximum abundance (%) |
|--------|----------------------|-------------------------|------------------|---------------|---------|-----------------------|-----------------------|
| ASV2   | Pleosporaceae        | <i>Bipolaris</i>        | <i>sp.</i>       | 18*           | 49      | 4.81                  | 92.06                 |
| ASV3   | Pleosporaceae        | <i>Bipolaris</i>        | <i>sp.</i>       | 16*           | 36      | 3.88                  | 83.54                 |
| ASV13  | Sarcoscyphaceae      | <i>Pithya</i>           | <i>sp.</i>       | 15*           | 46      | 1.06                  | 35.95                 |
| ASV18  | Mycosphaerellaceae   | <i>Mycocentrospora</i>  | <i>sp.</i>       | 18*           | 37      | 0.67                  | 42.90                 |
| ASV36  | Plectosphaerellaceae | <i>Gibellulopsis</i>    | <i>piscis</i>    | 18*           | 87      | 0.45                  | 4.33                  |
| ASV40  | Sarcoscyphaceae      | <i>Pithya</i>           | <i>sp.</i>       | 15*           | 46      | 0.44                  | 12.89                 |
| ASV59  | Bionectriaceae       | <i>Clonostachys</i>     | <i>rosea</i>     | 18*           | 84      | 0.24                  | 4.93                  |
| ASV65  | Pleosporaceae        | <i>Bipolaris</i>        | <i>sp.</i>       | 8             | 20      | 0.20                  | 8.80                  |
| ASV103 | Nectriaceae          | <i>Cylindrocarpon</i>   | <i>sp.</i>       | 18*           | 81      | 0.11                  | 2.38                  |
| ASV111 | Olpidiaceae          | <i>Olpidium</i>         | <i>brassicae</i> | 18*           | 41      | 0.10                  | 3.19                  |
| ASV114 | Pleosporaceae        | <i>Bipolaris</i>        | <i>sp.</i>       | 9             | 23      | 0.10                  | 4.54                  |
| ASV154 | Nectriaceae          | <i>Gibberella</i>       | <i>intricans</i> | 18*           | 78      | 0.07                  | 0.73                  |
| ASV167 | Nectriaceae          | <i>Cylindrocarpon</i>   | <i>sp.</i>       | 18*           | 80      | 0.06                  | 1.00                  |
| ASV171 | Mycosphaerellaceae   | <i>Mycosphaerella</i>   | <i>tassiana</i>  | 18*           | 82      | 0.06                  | 2.07                  |
| ASV231 | Pleosporaceae        | <i>Bipolaris</i>        | <i>sp.</i>       | 5             | 15      | 0.04                  | 3.26                  |
| ASV260 | Pleosporaceae        | <i>Curvularia</i>       | <i>sp.</i>       | 18*           | 69      | 0.03                  | 0.81                  |
| ASV282 | Magnaporthaceae      | <i>Magnaporthiopsis</i> | <i>sp.</i>       | 15*           | 33      | 0.03                  | 1.68                  |
| ASV415 | Physodermataceae     | <i>Paraphysoderma</i>   | <i>sp.</i>       | 16*           | 34      | 0.02                  | 1.26                  |
| ASV458 | Magnaporthaceae      |                         | <i>sp.</i>       | 13*           | 20      | 0.02                  | 1.20                  |
| ASV427 | Olpidiaceae          | <i>Olpidium</i>         | <i>brassicae</i> | 15*           | 31      | 0.02                  | 0.98                  |

**Supplementary Table 15:** List of chemical properties of, and detectable elements/compounds in, the tap water used for irrigation of the experimental pots, as provided by the local drinking water facility (Stadtwerke Konstanz GmbH, Konstanz, Germany). Actual measurements were performed by Eurofins Institut Jäger GmbH (Tübingen, Germany).

| <b>Measurement</b>              | <b>Value*</b>  |
|---------------------------------|----------------|
| pH                              | 7.92           |
| Electrical conductivity         | 332 $\mu$ S/cm |
| Total organic carbon            | 0.9 mg/l       |
| Oxygen (O <sub>2</sub> )        | 10.8 mg/l      |
| Nitrate (NO <sub>3</sub> )      | 3.9 mg/l       |
| Uranium (U)                     | 0.0011 mg/l    |
| Chromium (Cr)                   | 0.0005 mg/l    |
| Chlorine (Cl)                   | 7.6 mg/l       |
| Sodium (Na)                     | 6.2 mg/l       |
| Calcium (Ca)                    | 51.3 mg/l      |
| Kalium (K)                      | 1.4 mg/l       |
| Magnesium (Mg)                  | 8.7 mg/l       |
| Bicarbonate (HCO <sub>3</sub> ) | 160 mg/l       |

\*Water sample collection date: 23-08-2021
